1 **WTAP targets the METTL3 m<sup>6</sup>A-methyltransferase complex**  
2 **to cytoplasmic hepatitis C virus RNA to regulate infection**

3  
4 Short title: WTAP controls cytoplasmic m<sup>6</sup>A modification of hepatitis C viral RNA

5  
6

7  
8 **Matthew T. Sacco<sup>1</sup>, Katherine M. Bland<sup>1</sup>, and Stacy M. Horner<sup>1,2\*</sup>**

9  
10

11  
12

13 <sup>1</sup>Department of Molecular Genetics & Microbiology, Duke University Medical Center,  
14 Durham, NC 27710, USA

15 <sup>2</sup>Department of Medicine, Duke University Medical Center, Durham, NC 27710, USA

16  
17

18 \*Corresponding author. Email: [stacy.horner@duke.edu](mailto:stacy.horner@duke.edu)

19

20 **KEYWORDS**

21 **HCV, N6-methyladenosine, WTAP, METTL3, METTL14, RNA modification**

22

23

24 **ABSTRACT**

25 Modification of the hepatitis C virus (HCV) positive-strand RNA genome by N6-methyladenosine  
26 (m<sup>6</sup>A) regulates the viral lifecycle. This lifecycle takes place solely in the cytoplasm, while m<sup>6</sup>A  
27 addition on cellular mRNA takes place in the nucleus. Thus, the mechanisms by which m<sup>6</sup>A is  
28 deposited on the viral RNA have been unclear. In this work, we find that m<sup>6</sup>A modification of HCV  
29 RNA by the m<sup>6</sup>A-methyltransferase proteins METTL3 and METTL14 is regulated by WTAP.  
30 WTAP, a predominantly nuclear protein, is an essential member of the cellular mRNA m<sup>6</sup>A-  
31 methyltransferase complex and known to target METTL3 to mRNA. We found that HCV infection  
32 induces localization of WTAP to the cytoplasm. Importantly, we found that WTAP is required for  
33 both METTL3 interaction with HCV RNA and for m<sup>6</sup>A modification across the viral RNA genome.  
34 Further, we found that WTAP, like METTL3 and METTL14, negatively regulates the production of  
35 infectious HCV virions, a process that we have previously shown is regulated by m<sup>6</sup>A. Excitingly,  
36 WTAP regulation of both HCV RNA m<sup>6</sup>A modification and virion production were independent of  
37 its ability to localize to the nucleus. Together, these results reveal that WTAP is critical for HCV  
38 RNA m<sup>6</sup>A modification by METTL3 and METTL14 in the cytoplasm.

39

40 **IMPORTANCE**

41 Positive-strand RNA viruses such as HCV represent a significant global health burden. Previous  
42 work has described how HCV RNA contains the RNA modification m<sup>6</sup>A and how this modification  
43 regulates viral infection. Yet, how this modification is targeted to HCV RNA has remained unclear  
44 due to the incompatibility of the nuclear cellular processes that drive m<sup>6</sup>A modification with the  
45 cytoplasmic HCV lifecycle. In this study, we present evidence for how m<sup>6</sup>A modification is targeted  
46 to HCV RNA in the cytoplasm by a mechanism in which WTAP recruits the m<sup>6</sup>A-methyltransferase  
47 METTL3 to HCV RNA. This targeting strategy for m<sup>6</sup>A modification of cytoplasmic RNA viruses is  
48 likely relevant for other m<sup>6</sup>A-modified positive-strand RNA viruses with cytoplasmic lifecycles such

49 as enterovirus 71 and SARS-CoV-2 and provides an exciting new target for potential antiviral  
50 therapies.

51

## 52 **INTRODUCTION**

53 Hepatitis C virus (HCV) is a positive-sense single-stranded RNA (ssRNA) virus that  
54 represents a significant global health burden with over 1.5 million new infections and 400,000  
55 estimated disease related deaths annually (1). The ~9.6 kilobase RNA genome of HCV is  
56 translated in an internal ribosome entry site (IRES)-dependent manner as a single polyprotein,  
57 which is then cleaved by host and viral proteases into ten individual viral proteins (2). These viral  
58 proteins include Core, the viral capsid protein that interacts with HCV RNA for virion production;  
59 NS5A, a key coordinator of viral RNA replication; and NS5B, the virally encoded RNA-dependent  
60 RNA-polymerase (RdRp) (2). As HCV is a positive-sense ssRNA virus, the viral RNA genome  
61 serves not only as the mRNA template for translation of the viral proteins, but also as the template  
62 for RNA replication, and as the genetic material that is packaged into virions. Thus, spatial and  
63 temporal regulation of the viral genome is essential for successful viral replication (3). Indeed, the  
64 HCV RNA genome is regulated by several RNA elements such as miRNAs, secondary structures,  
65 and RNA-binding proteins (4). In addition, we have described previously how the RNA  
66 modification N6-methyladenosine ( $m^6A$ ) plays a crucial role in regulating the HCV lifecycle (5).

67 The RNA modification  $m^6A$  has now been shown to regulate infection by many viruses,  
68 through effects mediated by its presence on both viral RNA and cellular RNA (5-8).  $m^6A$  is the  
69 most prevalent eukaryotic internal mRNA modification and regulates many aspects of RNA  
70 biology, such as mRNA stability, mRNA translation and controlling interactions with RNA binding  
71 proteins (9-12). The addition of  $m^6A$  to mRNA, which occurs within a consensus sequence motif,  
72 DRACH (D=G/A/U, R=G/A, and H=U/C/A) is catalyzed by an enzymatic protein complex made  
73 up of the enzyme methyltransferase like 3 and its interacting cofactor methyltransferase like 14  
74 (METTL3+14), as well as accessory proteins, such as Wilms' tumor 1-associating protein (WTAP)

75 which colocalize at nuclear speckles (13-17). WTAP is essential for the function, localization, and  
76 RNA targeting of the m<sup>6</sup>A-methyltransferase complex, and as such acts as a “central coordinator”  
77 of m<sup>6</sup>A (13, 16, 18). In this role, WTAP interacts with several proteins that influence targeting of  
78 the m<sup>6</sup>A-methyltransferase complex to specific subcellular locations and mRNAs (13, 16, 18-20).  
79 RNA modification with m<sup>6</sup>A can be a dynamic process with removal of m<sup>6</sup>A from mRNA catalyzed  
80 by enzymes such as fat mass and obesity associated protein (FTO) (21). Taken together, these  
81 m<sup>6</sup>A regulatory proteins have been shown to regulate diverse aspects of RNA virus infection, such  
82 as innate immune evasion, viral translation, and packaging of viral RNA into virions (5, 22-28).  
83 This regulation can also occur at the level of the host through m<sup>6</sup>A mediated regulation of innate  
84 immunity or viral host factors (7, 8, 29, 30). During HCV infection, we previously found that the  
85 viral RNA genome is modified by m<sup>6</sup>A at multiple genomic sites and is bound by the known cellular  
86 m<sup>6</sup>A-binding YTHDF proteins (5, 31). Further, we found that m<sup>6</sup>A within the coding region of the  
87 HCV E1 gene negatively regulates viral particle production by preventing the interaction of the  
88 viral Core protein with the viral RNA (5). Others have since demonstrated how m<sup>6</sup>A modification  
89 of HCV RNA at other sites within the genome is important for viral RNA translation by enabling  
90 recruitment of host translation factors or for promoting infection by shielding viral RNA from  
91 immune sensing by the RNA binding protein RIG-I (22, 23, 32).

92         The molecular mechanism of how the m<sup>6</sup>A-methyltransferase complex is targeted to the  
93 HCV RNA for m<sup>6</sup>A modification is still unclear (5). This is because the addition of m<sup>6</sup>A to cellular  
94 mRNA by METTL3+14 occurs in concert with RNA polymerase II-driven transcription in the  
95 nucleus, while HCV RNA replication is mediated by the RdRp NS5B and takes place in the  
96 cytoplasm (2, 3, 33, 34). Thus, m<sup>6</sup>A modification of HCV RNA by the m<sup>6</sup>A-methyltransferase  
97 complex must be occurring in a non-canonical manner in the cytoplasm. While WTAP and other  
98 members of the METTL3+14 m<sup>6</sup>A-methyltransferase complex are predominately localized to the  
99 nucleus, we and others have previously shown by biochemical fractionation that these proteins  
100 can be detected in the cytoplasm (5, 35). Further, METTL3 m<sup>6</sup>A-modification independent

101 functions in the cytoplasm have been described (36). In fact, when the m<sup>6</sup>A-methyltransferase  
102 complex member ZC3H13 is depleted, biochemical fractionation and immunofluorescence  
103 microscopy revealed that multiple members of the m<sup>6</sup>A-methyltransferase complex, including  
104 METTL3 and WTAP, relocalize away from the nucleus (35), suggesting that these proteins may  
105 have undescribed cytoplasmic roles. Interestingly, studies of RNA viruses modified with m<sup>6</sup>A have  
106 demonstrated that viral infection can alter WTAP, METTL3, and METTL14 localization to the  
107 cytoplasm (28, 37, 38). Here, we investigated the hypothesis that WTAP targets  
108 METTL3+METTL14 to HCV RNA for m<sup>6</sup>A modification and m<sup>6</sup>A-mediated regulation of HCV  
109 infection. We found that WTAP is present in the cytoplasm following HCV infection and that it  
110 recruits METTL3 to HCV RNA for m<sup>6</sup>A modification. In addition, WTAP, like METTL3+14,  
111 negatively regulates the production of viral particles. Importantly, we also found the nuclear  
112 localization of WTAP was dispensable for m<sup>6</sup>A modification of HCV RNA and not required for  
113 regulation of infection. Overall, this work shows that WTAP actions in the cytoplasm control the  
114 METTL3+14-mediated m<sup>6</sup>A modification of HCV RNA.

115

## 116 **RESULTS**

### 117 **HCV infection alters the subcellular localization of the m<sup>6</sup>A machinery accessory protein** 118 **WTAP.**

119 To determine if HCV infection alters the nuclear localization of proteins in the m<sup>6</sup>A-  
120 methyltransferase, we fixed and stained Huh7 liver hepatoma cells that were infected with HCV  
121 or mock-infected for 48 hours and analyzed METTL3 subcellular localization by confocal  
122 microscopy. We found that METTL3 was predominantly localized to the nucleus in both mock and  
123 HCV-infected cells, with some distinct localization to the cytoplasm, and that this subcellular  
124 distribution of METTL3 did not change during infection (Fig. 1A-B). However, when we analyzed  
125 WTAP localization under the same conditions, we found that in response to HCV infection WTAP  
126 is present outside of the nucleus and that it localizes in close proximity with the HCV NS5A protein,

127 a marker of viral RNA replication compartments (39) (Fig. 1C). In contrast, mock-infected cells  
128 show only a limited level of WTAP in the cytoplasm (Fig. 1C). Indeed, quantification of the  
129 cytoplasmic and nuclear WTAP reveals increased WTAP in the cytoplasm in HCV-infected cells  
130 (Fig. 1D). While unlike WTAP, METTL3 localization was not changed with HCV infection, the  
131 basal levels of METTL3 in the cytoplasm were higher than those of WTAP in uninfected cells (Fig.  
132 1B-D). These data reveal that HCV infection results in increased localization of WTAP to the  
133 cytoplasm near sites of HCV replication and that METTL3 can be detected in the cytoplasm  
134 irrespective of HCV infection.

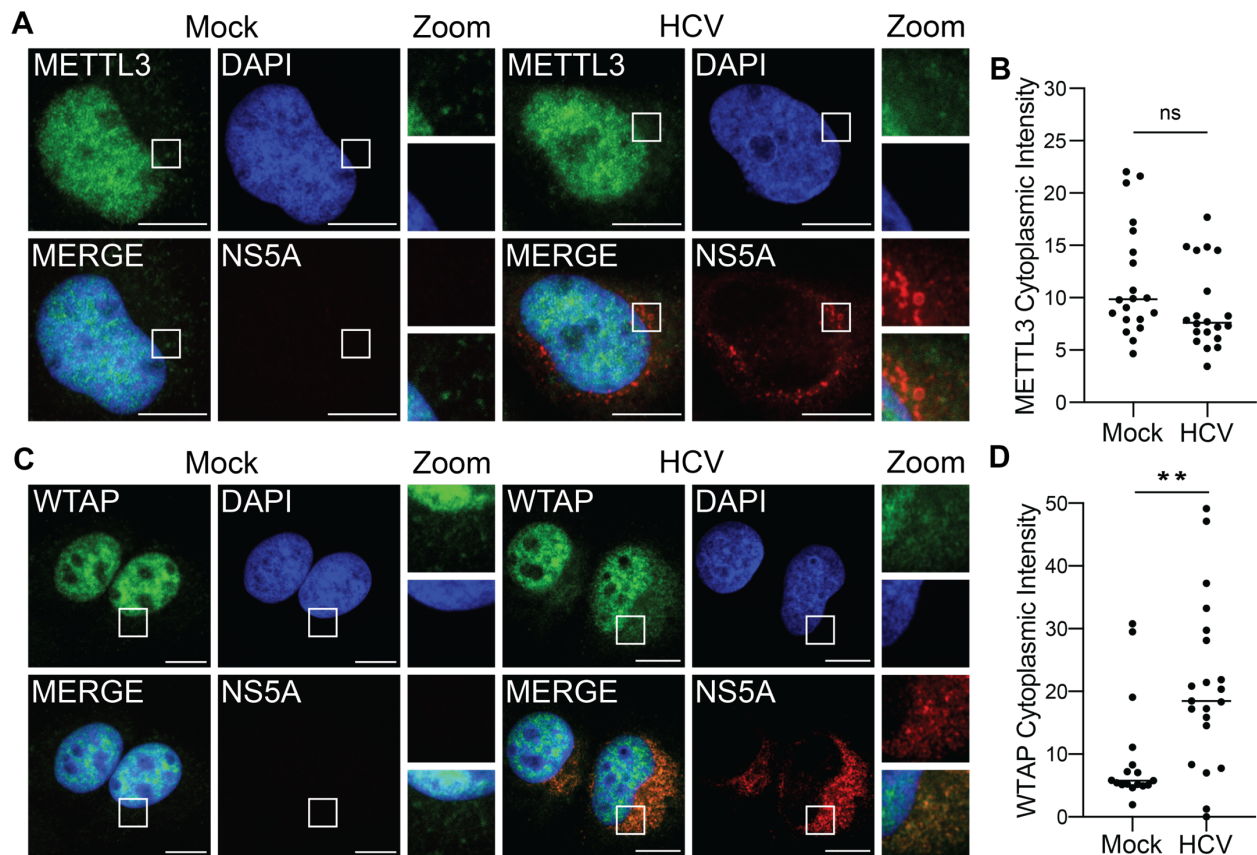

135  
136 **Figure 1: HCV infection alters the subcellular localization of the m<sup>6</sup>A machinery accessory**  
137 **protein WTAP. (A, C)** Confocal micrographs of Mock or HCV (48 hours, MOI 0.3) infected Huh7  
138 cells stained with DAPI and antibodies against HCV NS5A and either METTL3 **(A)** or WTAP **(C)**.  
139 Zoom is taken from area in the white box. **(B, D)** Quantification of the cytoplasmic intensity of

140 METTL3 (**B**) or WTAP (**D**), as described in the methods. Scale bars = 10  $\mu$ M. Graph shows mean  
141  $\pm$  SD, n=21 fields. Data analyzed by Welch's unequal variances *t*-test (\* -  $P < 0.05$ , \*\* -  $P < 0.01$ ,  
142 \*\*\* -  $P < 0.001$ , ns= not significant).

143

#### 144 **WTAP and METTL3+14 are essential for m<sup>6</sup>A modification of HCV RNA.**

145       Previously we found that abrogation of m<sup>6</sup>A at specific sites in the E1 coding region of the  
146 HCV RNA genome, as well as depletion of METTL3+14, increases the number of infectious viral  
147 particles by promoting viral RNA interaction with Core and packaging into virions (5). As  
148 METTL3+14, as well as WTAP, are essential for m<sup>6</sup>A modification of cellular mRNA, we tested if  
149 they are similarly required for m<sup>6</sup>A modification of HCV RNA (13, 16). To accomplish this, we  
150 extracted RNA from Huh7 cells that were siRNA depleted of WTAP, METTL3+14, or non-specific  
151 control and infected with HCV for 48 hours. We then measured the m<sup>6</sup>A levels of previously  
152 identified m<sup>6</sup>A peaks or YTHDF protein binding sites on fragmented viral and host RNA by m<sup>6</sup>A-  
153 specific methylated RNA immunoprecipitation with qPCR (meRIP-qPCR) (Fig. 2A) (5, 7, 15). We  
154 found that depletion of both WTAP and METTL3+14 led to reduced m<sup>6</sup>A levels at previously  
155 characterized HCV m<sup>6</sup>A sites on HCV RNA (Fig. 2A-2B) (5, 23). Similarly, depletion of both WTAP  
156 and METTL3+14 led to a significant reduction in the m<sup>6</sup>A levels on *GOLGA3*, a transcript known  
157 to be m<sup>6</sup>A modified during HCV infection (Fig. 2B-2C) (7). These data demonstrate that both  
158 WTAP and METTL3+14 are essential for the m<sup>6</sup>A modification of HCV RNA.

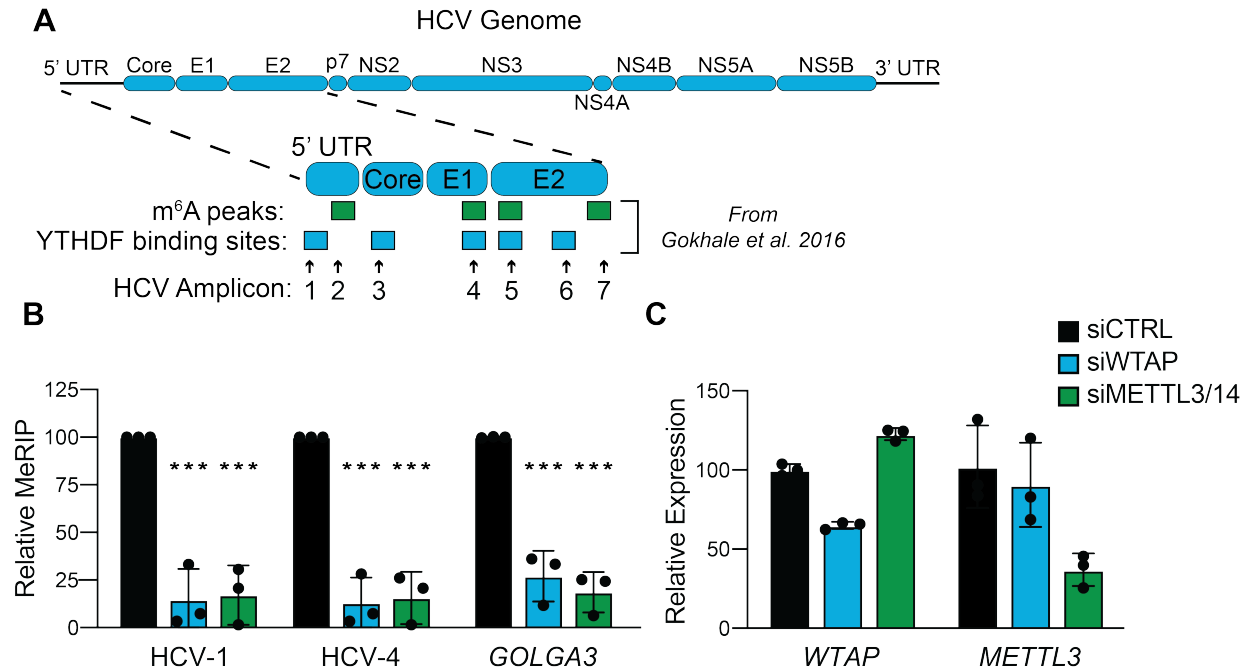

159

160 **Figure 2: WTAP and METTL3+14 are essential for m<sup>6</sup>A modification of HCV RNA. (A)**

161 Illustration of the HCV RNA genome with amplicons measured in this study and m<sup>6</sup>A peaks or

162 YTHDF protein binding sites identified in (5) are indicated. **(B)** Relative meRIP enrichment of the

163 indicated viral or cellular amplicons from Huh7 cells treated with the indicated siRNAs and infected

164 with HCV (48 hours, MOI 0.3), and **(C)** RT-qPCR analysis of indicated genes, relative to 18S

165 rRNA. For B, graph shows mean ± SD, n=3 biological replicates, while C is representative. Data

166 analyzed by two-way ANOVA with Šidák's multiple comparison test (\* - P < 0.05, \*\* - P < 0.01, \*\*\*

167 - P < 0.001, ns = not significant).

168

169 **METTL3 directly binds HCV RNA in a WTAP-dependent manner.**

170 The interaction of METTL3 with its mRNA substrates requires WTAP (16, 40). Thus, we

171 next tested whether METTL3 directly interacts with HCV RNA and if WTAP is required for this

172 interaction. We used ultraviolet (UV) light to cross-link protein and RNA in Huh7 cells treated with

173 siRNA against WTAP or control and infected with HCV for 72 hours. RNA-protein complexes

174 extracted from homogenized cells were immunoprecipitated with an antibody against METTL3,



175 or IgG as a non-specific control, followed by capture of the bound complexes and stringent  
 176 washing (Fig. 3A). RT-qPCR was then performed on extracted RNA with primers targeting  
 177 previously described HCV RNA m<sup>6</sup>A sites or m<sup>6</sup>A-reader YTHDF protein binding sites (5).  
 178 Immunoprecipitation of METTL3-RNA complexes enriched HCV RNA regions spanning the viral  
 179 genome, while non-specific IgG control did not (Fig. 3B). Importantly, depletion of WTAP  
 180 abrogated METTL3 enrichment of many of these HCV RNA regions (Fig. 3B). Together these  
 181 data reveal that METTL3 directly interacts with HCV RNA and that WTAP is required for this  
 182 interaction at several sites along the viral RNA genome.

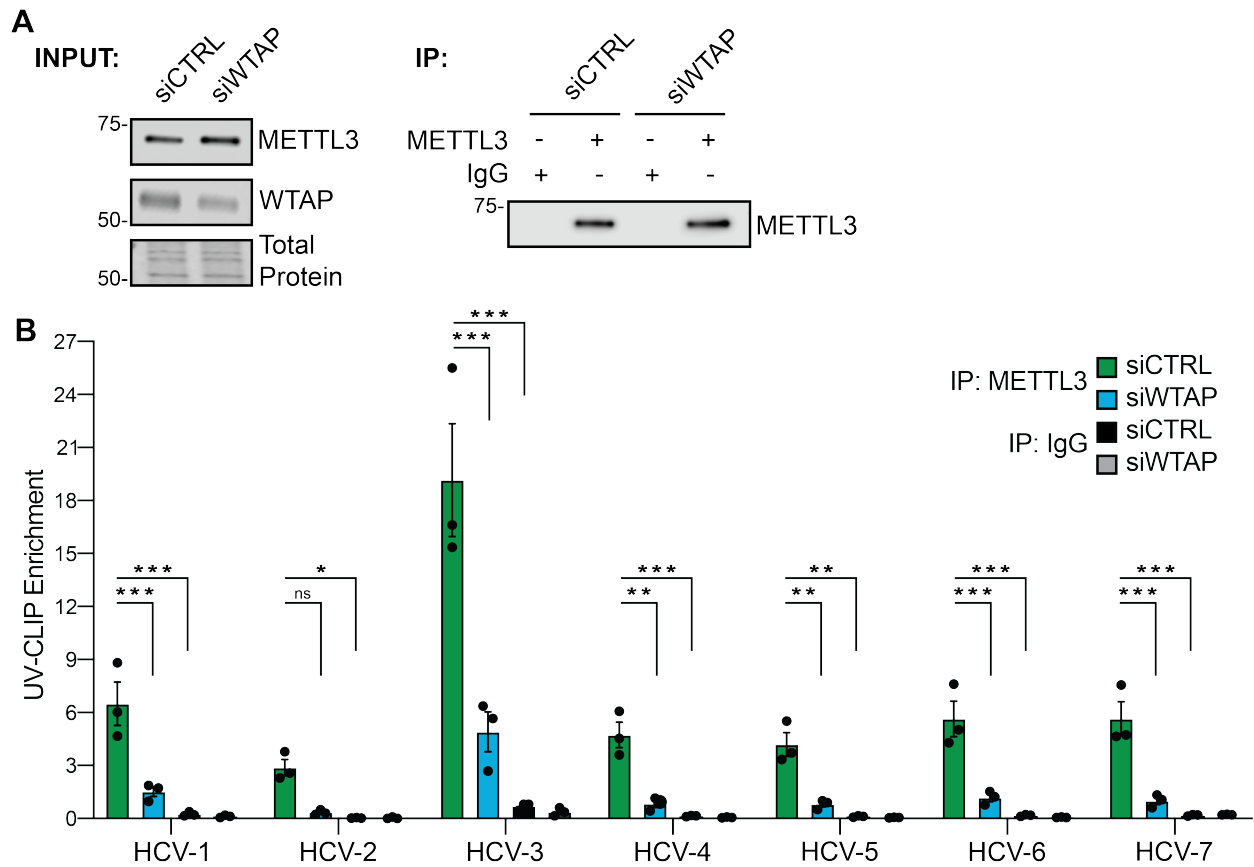

183  
 184 **Figure 3: METTL3 directly binds HCV RNA in a WTAP-dependent manner.** Huh7 cells were  
 185 treated with the indicated siRNA and infected with HCV (72 hours, MOI 1), followed by UV-CLIP  
 186 with anti-METTL3 or non-specific IgG. **(A)** Immunoblot analysis of input and immunoprecipitated  
 187 UV-CLIP lysates. **(B)** Enrichment of indicated amplicons as measured by RT-qPCR. Graph shows

188 mean  $\pm$  SD, n=3 biological replicates; blot is representative of 3 independent experiments. Data  
189 analyzed by two-way ANOVA with Šidák's multiple comparison test (\* -  $P < 0.05$ , \*\* -  $P < 0.01$ , \*\*\*  
190 -  $P < 0.001$ , ns = not significant).

191

## 192 **WTAP negatively regulates HCV virion production.**

193 We previously showed that METTL3+14 negatively regulate HCV infection by decreasing  
194 the production of infectious viral particles (5). To determine whether WTAP also regulates HCV  
195 infection, we depleted WTAP by siRNA in Huh7 cells or generated Huh7 cells stably over-  
196 expressing WTAP and then used a focus-forming assay to measure the production of infectious  
197 viral particles in the cellular supernatant harvested 48 hours after HCV infection. Depletion of  
198 WTAP resulted in an increase in the production of infectious viral particles in comparison to cells  
199 treated with a non-targeting control siRNA (Fig. 4A). As we have shown before, depletion of the  
200 m<sup>6</sup>A-methyltransferase proteins METTL3+14 or the m<sup>6</sup>A demethylase FTO resulted in a similar  
201 increase, or decrease, in the production of viral particles, respectively (Fig. 4A) (5). Immunoblot  
202 analysis of cellular extracts revealed that WTAP depletion, unlike METTL3+14, resulted in  
203 decreased abundance of the HCV NS5A replicase protein as compared to siRNA control (Fig.  
204 4B) (5). Overexpression of both WTAP and METTL3+14 reduced infectious HCV particle  
205 production relative to cells overexpressing GFP (Fig. 4C). Immunoblot analysis of lysates from  
206 infected Huh7 cells overexpressing either WTAP or METTL3+14 revealed that the abundance of  
207 the HCV NS5A protein was reduced by overexpression of these proteins, in comparison to cells  
208 overexpressing GFP (Fig. 4D).

209 As we previously found that METTL3+14 negatively regulate the production of infectious  
210 HCV particles, but not viral RNA replication (5), we next investigated if WTAP affected HCV RNA  
211 replication. For these experiments, we transfected HCV RNA encoding an internal *Gaussia*  
212 luciferase cassette as a reporter of viral replication (JFH1-QL/GLuc2A) into Huh7.5 cells in which  
213 the essential HCV entry factor CD81 had been deleted by CRISPR/Cas9 (Huh7.5-CD81 KO) (5,

214 41, 42). This allows for HCV RNA replication to be measured independent of virion production  
 215 and spread. Depletion of WTAP did not alter the levels of HCV RNA replication relative to the  
 216 control non-targeting siRNA over a time course (Fig. 4E). Similarly, as we have shown previously,  
 217 METTL3+14 depletion did not significantly alter HCV RNA replication (5), whereas depletion of  
 218 phosphatidylinositol 4-kinase alpha (PI4KA), a known host factor required for HCV RNA  
 219 replication, decreased HCV RNA replication (Fig. 4E) (43). Together these data reveal that WTAP  
 220 regulates the production of infectious HCV particles but does not impact viral RNA replication.

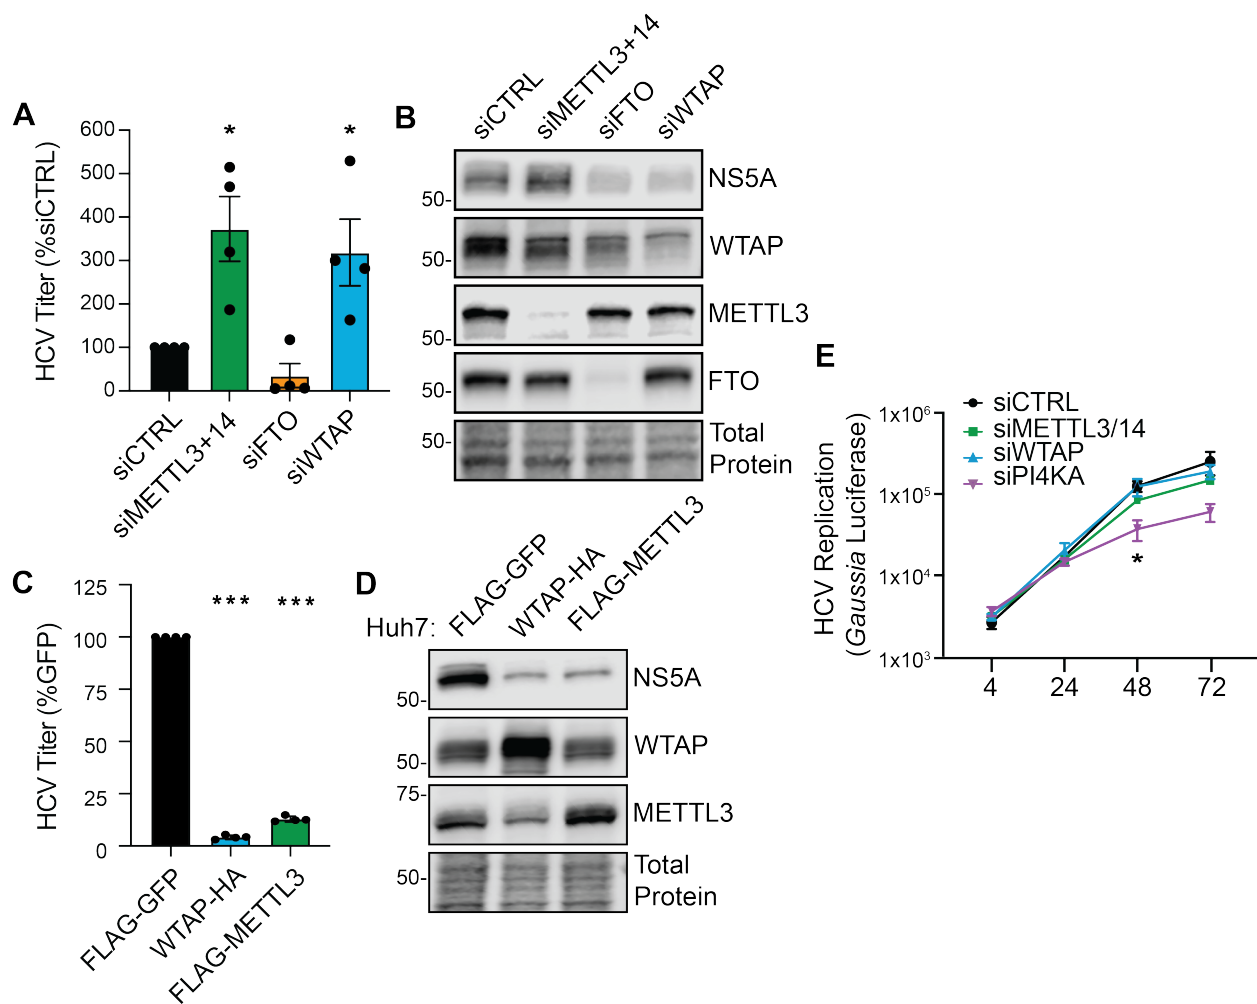

221  
 222 **Figure 4: WTAP negatively regulates HCV virion production.** (A) Focus-forming assay of  
 223 supernatant harvested from HCV-infected (48 hours, MOI 0.3) Huh7 cells, as well as (B)  
 224 immunoblot analysis of these lysates. (C) Focus-forming assay of supernatant harvested from

225 HCV-infected (48 hours, MOI 0.3) Huh7 cells overexpressing the indicated proteins, as well as  
226 **(D)** immunoblot analysis of these lysates. For WTAP and METTL3, protein-specific antibodies  
227 detect both endogenous and overexpressed proteins. **(E)** *Gaussia* luciferase values from the  
228 supernatant of Huh7.5-CD81 KO cells treated with the indicated siRNA and transfected with a  
229 full-length HCV RNA containing a *Gaussia* luciferase reporter cassette, measured at indicated  
230 hour post transfection. Graphs show mean  $\pm$  SD, n=3 (C, E) or 4 (A) biological replicates; blots  
231 are representative of 3 independent experiments. Data analyzed by one-way ANOVA with Šidák's  
232 multiple comparison test (\* -  $P < 0.05$ , \*\* -  $P < 0.01$ , \*\*\* -  $P < 0.001$ , ns = not significant).

233

#### 234 **WTAP regulation of HCV RNA m<sup>6</sup>A modification is independent of its nuclear localization.**

235 Cellular mRNA is m<sup>6</sup>A modified by the m<sup>6</sup>A-methyltransferase complex in the nucleus (13,  
236 16, 17). As WTAP positively regulates HCV RNA m<sup>6</sup>A modification and relocalizes to the  
237 cytoplasm during HCV infection, we hypothesized that WTAP-regulation of HCV RNA m<sup>6</sup>A  
238 modification is independent of its nuclear localization. To test this, we generated an Huh7 cell line  
239 overexpressing WTAP lacking its described nuclear localization signal (NLS; WTAP- $\Delta$ NLS) and  
240 measured HCV m<sup>6</sup>A modification on fragmented viral and host RNA by meRIP-qPCR (Fig. 5A)  
241 (17). The m<sup>6</sup>A levels of the cellular mRNA *GOLGA3*, which we have previously shown to have  
242 increased m<sup>6</sup>A during HCV infection, are increased by overexpression of wild-type WTAP but not  
243 by WTAP- $\Delta$ NLS (Fig. 5A) (7). Excitingly, the m<sup>6</sup>A levels of multiple HCV sites across the genome  
244 are similarly increased by overexpression of either wild-type WTAP or WTAP- $\Delta$ NLS, which does  
245 not localize to the nucleus (Fig. 5A-5B). Taken together, these data reveal that WTAP regulation  
246 of HCV RNA m<sup>6</sup>A methylation, in contrast to cellular mRNA, can occur independent of its nuclear  
247 localization.

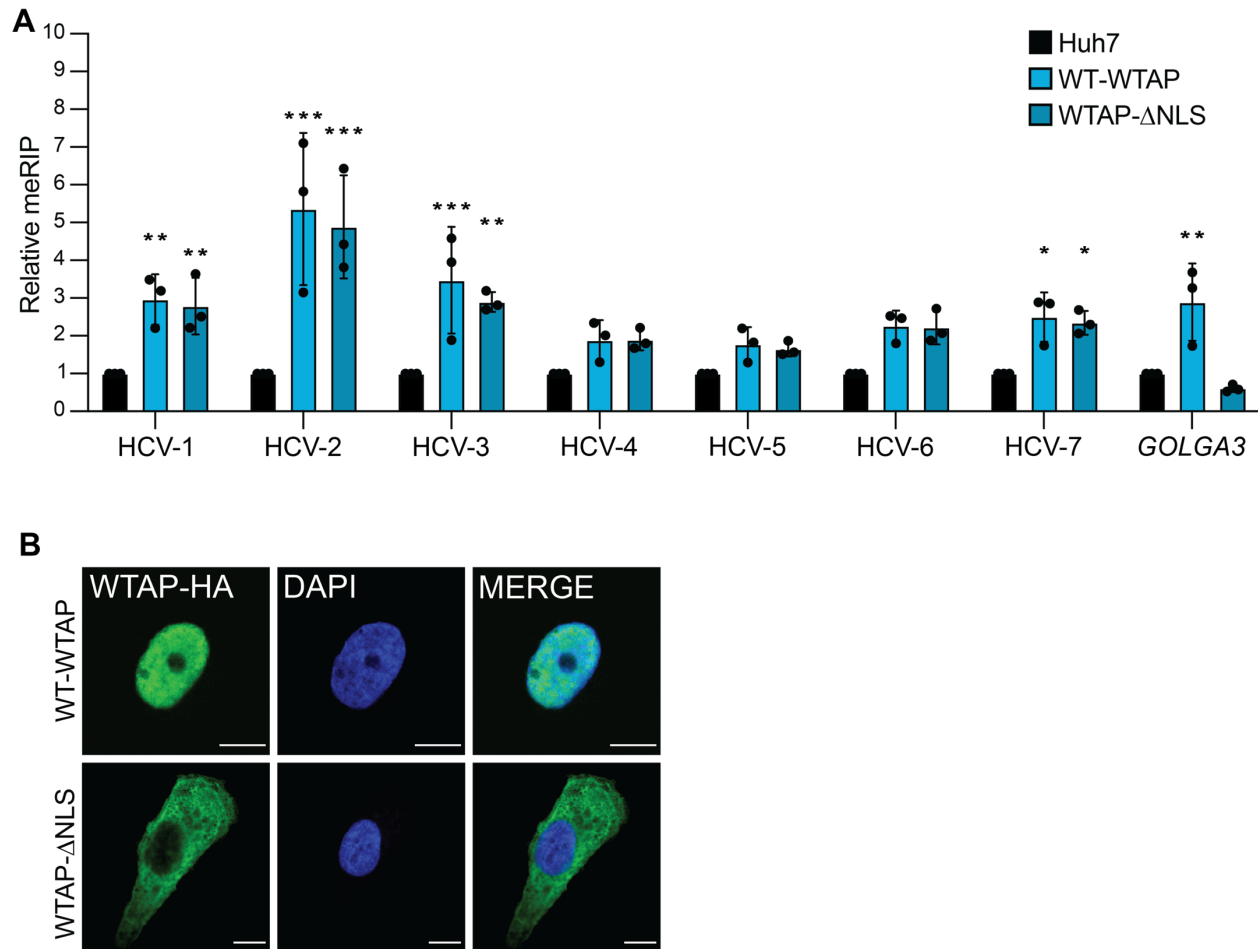

248

249 **Figure 5: WTAP regulation of HCV RNA m<sup>6</sup>A modification is independent of its nuclear**

250 **localization. (A)** Relative meRIP enrichment of indicated amplicons in HCV-infected (72 hours,

251 MOI 1) parental Huh7, wild-type-WTAP-HA, or WTAP $\Delta$ NLS-HA overexpressing cells. **(B)**

252 Confocal micrographs of Huh7 cells overexpressing WT-WTAP-HA or WTAP $\Delta$ NLS-HA stained

253 as indicated. Graph show mean  $\pm$  SD, n=3 biological replicates for (A) with micrographs of

254 localization shown in (B); Scale bars = 10  $\mu$ M. Data analyzed by two-way ANOVA with Šidák's

255 multiple comparison test (\* - P < 0.05, \*\* - P < 0.01, \*\*\* - P < 0.001, ns = not significant).

256

257 **WTAP regulation of HCV virion production requires METTL3 interaction but not nuclear**

258 **localization.**

259           As our data reveals that WTAP regulates HCV RNA m<sup>6</sup>A modification and that this  
260 regulation is independent of WTAP nuclear localization, we next sought to determine features of  
261 WTAP required for regulation of HCV virion production. To accomplish this, we used Huh7 cells  
262 overexpressing wild-type WTAP, WTAP- $\Delta$ NLS, or a newly generated cell line expressing a mutant  
263 WTAP that does not interact with METTL3 (WTAP- $\Delta$ METTL3), as seen by co-immunoprecipitation  
264 (17, 44) (Fig. 6A). We then measured the production of infectious viral particles in the cellular  
265 supernatant 48 hours after HCV infection by focus-forming assay. We found that WTAP requires  
266 its METTL3 interaction domain to negatively regulate HCV particle production (Fig. 6B). However,  
267 WTAP lacking its nuclear localization signal still reduced HCV particle production, although not  
268 as much as wild-type WTAP (Fig. 6B). Immunoblot analysis of these lysates revealed that the  
269 levels of HCV NS5A protein are decreased by both wild-type WTAP and WTAP- $\Delta$ NLS but not by  
270 WTAP- $\Delta$ METTL3, which corroborates the results of the focus-forming assay (Fig. 6C-6D).  
271 Although WTAP is not expressed equally between the mutants, the difference in expression is  
272 not equal to the magnitude of the reduction in infectious viral particles (Fig. 6B-6E). Taken  
273 together, these data reveal that WTAP features essential for its regulation of HCV RNA m<sup>6</sup>A  
274 modification, but not those needed for cellular mRNA modification (Fig. 5), are required for  
275 negative regulation of HCV virion production.

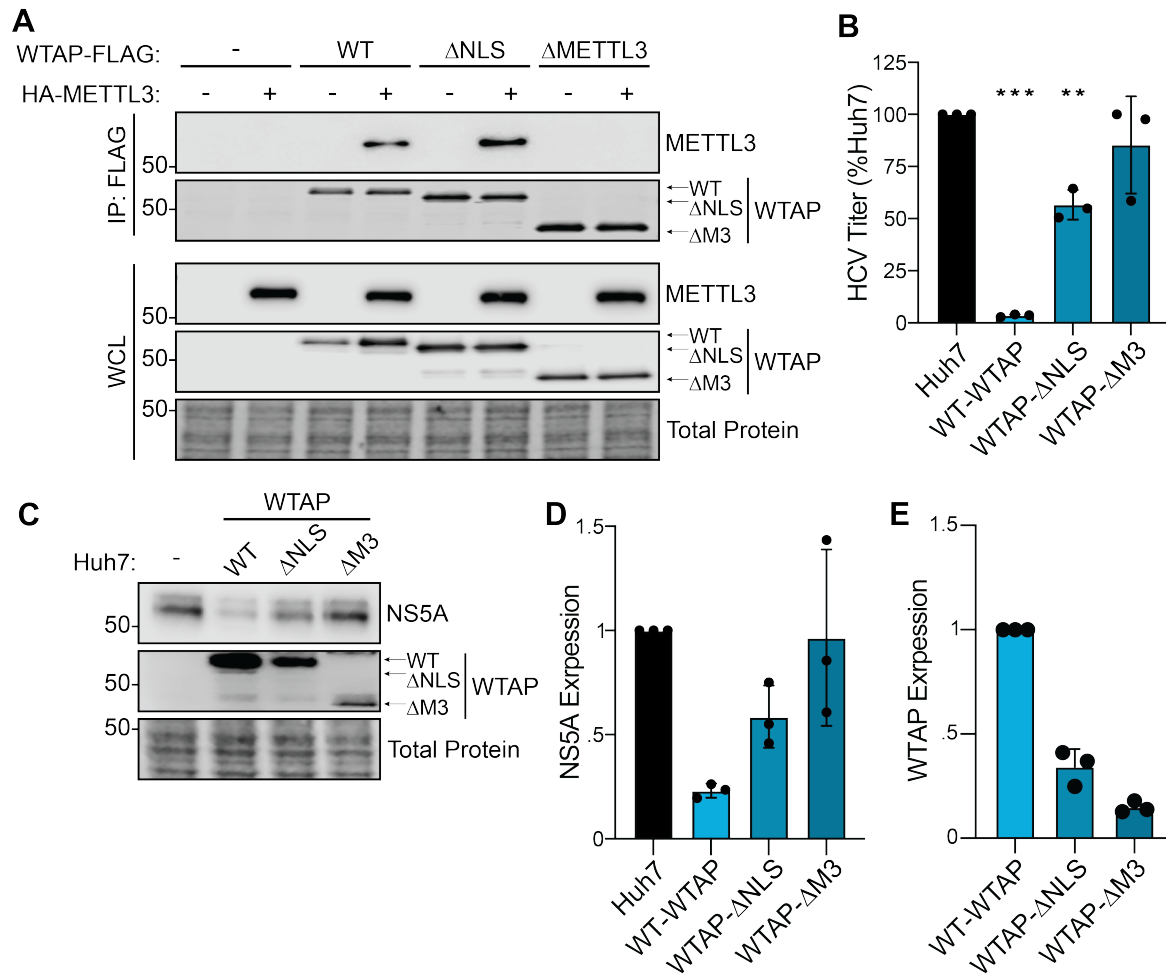

276

277 **Figure 6: WTAP regulation of HCV virion production requires METTL3 interaction but not**

278 **nuclear localization.**(A) Immunoblot analysis of anti-FLAG immunoprecipitated lysates from

279 Huh7 cells co-transfected with HA-METTL3 and indicated WTAP-FLAG constructs, either wild-

280 type, ΔNLS, or ΔMETTL3 interaction. (B) Focus-forming assay of supernatant harvested from

281 HCV-infected (48 hours, MOI 0.3) Huh7 cells overexpressing the indicated protein, as well as (C)

282 immunoblot analysis of lysates and (D-E) quantification of NS5A and WTAP levels, relative total

283 protein. Graphs show mean ± SD (n=3 biological replicates), blots are representative of 3

284 independent experiments. Data analyzed by one-way ANOVA with Šidák's multiple comparison

285 test (\* - P < 0.05, \*\* - P < 0.01, \*\*\* - P < 0.001, ns = not significant).

286

## 287 **DISCUSSION**

288           Previously, we found that the HCV RNA genome is modified by m<sup>6</sup>A and that both  
289 abrogation of specific m<sup>6</sup>A sites on the HCV RNA genome and depletion of METTL3+14 regulate  
290 viral particle production (5). Others have shown that m<sup>6</sup>A sites on HCV RNA also can promote  
291 viral translation or evasion of RIG-I sensing (23, 32). While these studies reveal that m<sup>6</sup>A on HCV  
292 RNA regulates the viral lifecycle, the mechanisms by which the HCV RNA in the cytoplasm is  
293 targeted by METTL3+14 for m<sup>6</sup>A modification have remained unclear. This is in part because  
294 METTL3+14 are described as functioning in the nucleus, and the mechanisms by which they are  
295 known to target mRNA for m<sup>6</sup>A modification would not apply to targeting HCV RNA in the  
296 cytoplasm (33, 34, 45, 46). For example, METTL3+14 localize to chromatin and interact with RNA  
297 polymerase II to m<sup>6</sup>A methylate mRNA in a co-transcriptional process, but HCV RNA replication  
298 does involve RNA polymerase II or occur in the nucleus near chromatin (33). While our previous  
299 biochemical fractionation experiments did reveal that METTL3+14 could be localized in the  
300 cytoplasm, and others have shown the METTL3 has cytoplasmic functions, neither total cellular  
301 nor cytoplasmic levels of METTL3+14 change with HCV infection, and so how these proteins  
302 could be repurposed for cytoplasmic addition of m<sup>6</sup>A was unclear (5, 36). Here, we set out to  
303 determine how METTL3+14 are targeted to HCV RNA for m<sup>6</sup>A modification in the cytoplasm. We  
304 found that WTAP, the METTL3+14 interacting protein that coordinates RNA targeting by the  
305 broader m<sup>6</sup>A-methyltransferase complex, has increased localization to the cytoplasm during HCV  
306 infection. Importantly, we found that WTAP is essential for METTL3 interaction with HCV RNA  
307 and its m<sup>6</sup>A modification, and that WTAP negatively regulates the production of infectious HCV  
308 particles, like METTL3+14 (5). Thus, this work reveals new insights into how the m<sup>6</sup>A-  
309 methyltransferase complex is repurposed to control HCV infection and highlights the contribution  
310 of WTAP in regulating HCV RNA m<sup>6</sup>A modification and infection.

311           Our work shows that proteins beyond METTL3 are important to target the m<sup>6</sup>A-  
312 methyltransferase complex to HCV RNA for modification. This is supported by the fact that



313 although METTL3 preferentially modifies DRACH motifs *in vitro*, not all consensus motifs are  
314 modified in cells (14, 15, 47-50). Indeed, METTL3 was originally identified as part of a complex of  
315 proteins with m<sup>6</sup>A-methyltransferase activity (51, 52). This protein complex is now known to  
316 include both METTL14 and WTAP, which have specific functions in regulating m<sup>6</sup>A deposition  
317 (13, 16). METTL14 interacts with METTL3 and targets METTL3+14 to sites of active transcription  
318 marked by histone H3 trimethylation at lysine 36 (53). METTL3+14 then interact with WTAP (13,  
319 16, 17), and WTAP broadly controls RNA targeting of the m<sup>6</sup>A-methyltransferase complex, with  
320 targeting to specific mRNAs regulated by WTAP-interacting proteins such as RBM15, VIRMA,  
321 and ZC3H13 (18-20, 35, 54). This m<sup>6</sup>A-methyltransferase complex then interacts with RNA  
322 polymerase II to add m<sup>6</sup>A to nascent mRNA (33, 34). While this mechanism for m<sup>6</sup>A modification  
323 drives the bulk of m<sup>6</sup>A on mRNA, in some cases, METTL3 can be directly recruited to mRNA  
324 transcription start sites via the protein CEBPZ (46). HCV m<sup>6</sup>A modification must happen differently  
325 than cellular m<sup>6</sup>A modification because the HCV RNA is regulated differently than cellular RNA.  
326 First, HCV transcription is mediated by the viral RNA-dependent RNA-polymerase NS5B and not  
327 RNA polymerase II and thus m<sup>6</sup>A modification of HCV RNA is not necessarily co-transcriptional  
328 (2). Second, HCV RNA is solely present in the cytoplasm, separate from nuclear chromatin and  
329 histones (3). As such, a unique mechanism must recruit METTL3+14 to HCV RNA. Our work  
330 shows that WTAP is important for METTL3+14 targeting to HCV RNA, that WTAP relocalizes to  
331 the cytoplasm during infection, and that m<sup>6</sup>A modification of HCV in the cytoplasm is driven by  
332 WTAP.

333 WTAP relocalization during HCV infection is likely a key factor that drives how viral RNA  
334 gets m<sup>6</sup>A modified in the cytoplasm; however, questions remain as to how this occurs. We do  
335 know that during infection, HCV remodels intracellular membranes to generate replication  
336 compartments (55). These compartments contain pores that are coated by nucleoporin proteins  
337 recruited from the nuclear envelope, and these nucleoporin proteins can mediate selective access  
338 for proteins involved in viral replication (56, 57). As such, we hypothesized that WTAP utilizes its

339 NLS to access these replication compartments to facilitate m<sup>6</sup>A modification of HCV RNA.  
340 However, we found that the NLS of WTAP is dispensable for m<sup>6</sup>A modification of HCV RNA at  
341 the sites we tested (Fig. 5), while it seems to be partially required to regulate infection (Fig. 6).  
342 This suggests that WTAP regulation of HCV infection may also occur independent of its function  
343 in targeting HCV RNA for m<sup>6</sup>A modification. However, it is clear that WTAP recruitment to HCV  
344 RNA occurs through mechanism that does not require its NLS. It could be that a viral protein  
345 recruits WTAP to the HCV RNA. However, this would not explain how HCV infection induces  
346 WTAP localization to the cytoplasm. Interestingly, the nuclear localization of WTAP can be  
347 regulated by the cellular protein ZC3H13 (35), and a prior screen for cellular-HCV protein  
348 interactions suggested that three HCV proteins may interact with WTAP (58). Thus, it is possible  
349 that a viral protein interacts with newly translated WTAP to prevent its interaction with ZC3H13  
350 and keep WTAP in the cytoplasm. This viral protein could then bring WTAP and METTL3+14 to  
351 HCV RNA. In support of this model, HCV E1, NS3, and NS4B, the three proteins suggested to  
352 interact with WTAP, have all been shown to broadly interact with HCV RNA and thus are  
353 candidates for bringing a WTAP/METTL3+14 complex to viral RNA for m<sup>6</sup>A modification (59-61).  
354 In fact, for other RNA viruses known to be m<sup>6</sup>A modified, such as enterovirus 71, severe acute  
355 respiratory syndrome coronavirus-2 (SARS-CoV-2), and human metapneumovirus, viral proteins  
356 do either interact or co-localize with METTL3, METTL14, or WTAP (37, 38, 62). This suggests  
357 that m<sup>6</sup>A-targeting may be altered during infection, indeed we have observed this previously (7).  
358 Thus, identifying which HCV and cellular proteins interact with the m<sup>6</sup>A-methyltransferase  
359 complex during infection will be critical to understanding how m<sup>6</sup>A modification is regulated during  
360 infection.

361 m<sup>6</sup>A modification of HCV RNA occurs at several positions across the genome, and several  
362 of these m<sup>6</sup>A sites regulate specific aspects of the HCV lifecycle (5, 23, 32). Our initial study  
363 identified sixteen high confidence m<sup>6</sup>A sites across the HCV RNA genome, and three of these  
364 sites have unique functions during HCV infection (5, 23, 32). Our understanding of how m<sup>6</sup>A

365 modification at each of these sites occurs in relation to each other is limited. It may be that there  
366 are unique mechanisms that recruit METTL3+14 to viral RNA to m<sup>6</sup>A modify specific sites, with  
367 differing effects on the HCV lifecycle. This possibility may explain why METTL3+14 and WTAP  
368 depletion differentially affect NS5A expression, although it is unclear how m<sup>6</sup>A could both  
369 positively regulates IRES-mediated translation and negatively regulate the levels of HCV proteins  
370 (Fig. 4) (23). Importantly, current methods to identify m<sup>6</sup>A do not allow for specific mapping of the  
371 m<sup>6</sup>A profile for each copy of the viral RNA during infection. This m<sup>6</sup>A profile on individual viral  
372 RNAs may regulate distinct viral processes, such as translation, transcription, or virion production.  
373 As such, it may be that the HCV RNA molecules involved in active translation may have one set  
374 of m<sup>6</sup>A sites modified, whereas those involved in viral packaging have a different set of m<sup>6</sup>A sites  
375 modified. Each of these m<sup>6</sup>A profiles could arise from different viral RNA targeting factors. In fact,  
376 WTAP enhancement of m<sup>6</sup>A modification does not appear to be uniform for all tested regions of  
377 HCV RNA (Fig. 5). Thus, additional viral RNA targeting factors may be required for modification  
378 of particular m<sup>6</sup>A sites.

379 Overall, this study reveals that WTAP is an important regulator of m<sup>6</sup>A modification of a  
380 cytoplasmically localized RNA. Specifically, WTAP regulates HCV RNA m<sup>6</sup>A modification and as  
381 such it regulates virion production. Importantly, this regulation by WTAP is independent of its  
382 ability to localize to the nucleus. Thus, this work supports of model by which HCV infection induces  
383 WTAP localization changes to mediate cytoplasmic m<sup>6</sup>A modification of viral RNA. Studies of how  
384 methylation of specific HCV m<sup>6</sup>A sites are controlled and how HCV RNA m<sup>6</sup>A modification is  
385 regulated throughout the viral lifecycle will undoubtedly provide insight into the mechanisms  
386 involved. Our work reveals that we still have much to learn of the processes that govern m<sup>6</sup>A  
387 methylation, an RNA regulatory mechanism critical in cellular differentiation, numerous cancers,  
388 and infection by an ever-growing list of viruses, including those of global health concern such as  
389 SARS-CoV-2 and members of the *Flaviviridae*.

390

391 **ACKNOWLEDGEMENTS**

392 We thank those colleagues who generously provided reagents including Dr. Matthew Evans, Dr.  
393 Michael Gale Jr., Dr. Stanley Lemon, and Dr. Charlie Rice; the Duke Functional Genomics Core,  
394 the Duke Light Microscopy Core Facility, and members of the Horner Lab for valuable feedback  
395 and discussion. This work was supported by Burroughs Wellcome Fund (S.M.H, M.T.S.) and  
396 National Institutes of Health grants R01AI125416 (S.M.H, M.T.S., K.M.B) and T32CA00911  
397 (M.T.S, K.M.B).

398

399 **METHODS**

400 **Cell Culture**

401 Huh7, Huh7.5 (gift of Dr. Michael Gale Jr., University of Washington (63)), Huh7.5 CD81 KO (gift  
402 of Dr. Matthew Evans, Icahn School of Medicine at Mount Sinai (64)) and 293T cells were grown  
403 in Dulbecco's modification of Eagle's medium (DMEM; Mediatech) supplemented with 10% fetal  
404 bovine serum (HyClone), 25 mM N-2-hydroxyethylpiperazine-N'-2-ethanesulfonic acid (Thermo  
405 Fisher), and 1X non-essential amino acids (Thermo Fisher), referred to as complete DMEM  
406 (cDMEM). Cells were verified using the Promega GenePrint STR kit (DNA Analysis Facility, Duke  
407 University) and as mycoplasma free by the LookOut Mycoplasma PCR detection kit (Sigma-  
408 Aldrich).

409

410 **Plasmids**

411 The following plasmids were generated by subcloning polymerase chain-reaction (PCR)  
412 generated amplicons from the indicated oligonucleotides from Table 1 into pEFtak or pLEX vector  
413 using In-fusion recombinase (Takara) according to manufacturer's instructions: pEFtak-WTAP-  
414 FLAG, pEFtak-WTAP $\Delta$ NLS-FLAG, pEFtak-WTAP $\Delta$ METTTL3-FLAG, pEFtak-HA-METTTL3, pLEX-  
415 WTAP-HA, pLEX-FLAG-METTTL3, pLEX-WTAP $\Delta$ NLS-HA, pLEX-FLAG-GFP and pLEX-

416 WTAP $\Delta$ METTL3-HA. pJFH1-QL/GLuc2A was a gift of Dr. Stanley Lemon (University of North  
417 Carolina at Chapel Hill (42)).

418

### 419 ***In Vitro* Transcription**

420 Generation of HCV luciferase reporter RNA was accomplished with the MEGAscript T7  
421 transcription kit (Invitrogen) using XbaI-linearized and Mung Bean Nuclease-treated (enzymes  
422 from New England Biolabs) JFH1-QL/GLuc2A plasmid (42), following the manufacturer's  
423 instructions.

424

### 425 **Viruses**

426 Infectious stocks of a cell culture-adapted strain of genotype 2A JFH-1 HCV (JFH-1 M9 (65)) were  
427 generated in Huh7.5 cells. Measurement of viral titers and virion production from infected  
428 supernatants was performed in Huh7.5 cells by focus-forming assay (FFA), as previously  
429 described (65). For viral infections, cells were incubated in a low volume of serum free DMEM  
430 containing virus at the indicated multiplicity of infection (MOI) for 3 hours, following which cDMEM  
431 was replenished.

432

### 433 **Cell Line Generation**

434 293T cells were transfected with pLEX-WTAP-HA, pLEX-FLAG-METTL3, pLEX-WTAP $\Delta$ NLS-HA,  
435 or pLEX-WTAP $\Delta$ METTL3-HA and the viral packaging plasmids psPAX2 and pMD2.G (Addgene  
436 #12260 and #12259; gift of Duke Functional Genomics Facility) and supernatant was harvested  
437 and filtered with an 0.22  $\mu$ m filter 72 hours after transfection. This filtered supernatant was then  
438 used to transduce Huh7 cells for 24 hours. Transduced cells were then placed in 2  $\mu$ g/ $\mu$ L  
439 puromycin for 72 hours and then overexpression validated by immunoblotting, as described

440 below. After selection and validation, cell lines were maintained in 1 µg/µL puromycin cDMEM  
441 until the time of experimentation.

442

#### 443 **siRNA Treatment**

444 Cells were transfected with siRNA against indicated targets using Lipofectamine RNAiMAX  
445 (Thermo Fisher) according to the manufacturer's protocol for 24 hours prior to experimental  
446 infection or treatment. Depletion of siRNA targets was confirmed by immunoblot analysis. siRNAs  
447 (Qiagen) used included siWTAP (SI00069853), siMETTL3 (SI04317096), siMETTL14  
448 (SI00459942), siFTO (SI04177530), siPI4KA (SI02777390) and siCTRL (1027281).

449

#### 450 **Luciferase Assay**

451 Huh7.5 CD81 KO cells seeded into 12 well plates were transfected with siRNAs as described  
452 above. Cells were then transfected with 1 µg of JFH1-QL/GLuc2A *in vitro* transcribed RNA (1 µg)  
453 using polyethylenimine (Polysciences, Inc.). Supernatants were harvested and mixed with Renilla  
454 luciferase buffer and substrate, and luciferase values were measured according to manufacturer's  
455 instructions (Renilla Luciferase Assay System, Promega) using a BioTek Synergy 2 microplate  
456 reader.

457

#### 458 **Immunoblotting**

459 Cells were lysed in a modified radio immunoprecipitation assay (RIPA) buffer (10 mM Tris pH 7.5,  
460 150 mM NaCl, 0.5% sodium deoxycholate, 1% Triton X-100) supplemented with protease inhibitor  
461 cocktail (Sigma-Aldrich) and phosphatase inhibitor cocktail (Millipore), and supernatants were  
462 collected after centrifugal clarification. Quantified protein, as determined by Bradford assay  
463 (BioRad), was resolved by SDS-PAGE, transferred to nitrocellulose or polyvinylidene difluoride  
464 (PVDF) membranes using the Turbo-transfer system (BioRad), stained with REVERT total protein  
465 stain (Licor Biosciences) and blocked with 3% bovine serum albumin (BSA) (Sigma-Aldrich) in

466 phosphate buffered saline (PBS) with 0.1% Tween (PBS-T). Membranes were probed with  
467 specific antibodies, washed with PBS-T and incubated with species-specific HRP conjugated  
468 antibodies (Jackson ImmunoResearch), washed again with PBS-T, and treated with Pico PLUS  
469 enhanced chemiluminescent (ECL) reagent (Thermo Fisher). The signal was then captured by  
470 using a LICOR Odyssey FC.

471

## 472 **Protein Immunoprecipitation**

473 50-100 µg of protein extracted as above was incubated with 25 µL anti-FLAG M2 magnetic beads  
474 (Sigma-Aldrich) in modified 1X RIPA in a total volume of 300 µL at 4°C overnight with rotation.  
475 Beads were washed 3 times in PBS and eluted in 40 µL 2X Laemmli Buffer with 1:20 β-mercapto-  
476 ethanol (BioRad) at 95°C for 5 minutes. Eluates were resolved by  
477 SDS-PAGE and immunoblotting, as described above.

478

## 479 **RT-qPCR**

480 Total cellular RNA was extracted using the Qiagen RNeasy kit (Life Technologies) or TRIzol  
481 extraction (Thermo Fisher). RNA was then reverse transcribed using the iSCRIPT cDNA  
482 synthesis kit (BioRad) as per the manufacturer's instructions. The resulting cDNA was diluted 1:5  
483 in nuclease-free distilled H<sub>2</sub>O. RT-qPCR was performed in triplicate using the Power SYBR Green  
484 PCR master mix (Thermo Fisher) and the Applied Biosystems QuantStudio 6 Flex RT-PCR  
485 system. Primer sequences for RT-qPCR are listed in Table 1.

486

## 487 **MeRIP**

488 For meRIP, total RNA was extracted from cells using TRIzol (Thermo Fisher) according to the  
489 manufacturer's protocol and diluted to equivalent concentrations. Then, meRIP was performed  
490 as previously described (8). Following meRIP, cDNA from the input and immunoprecipitated RNA  
491 fractions was generated and analyzed by RT-qPCR as described above. Relative m<sup>6</sup>A level for

492 each transcript was calculated as the percent of input in each condition normalized to that of the  
493 respective positive control m<sup>6</sup>A RNA spike-in, as described (8). Percent change of enrichment  
494 was calculated with siCTRL samples normalized to 100.

495

#### 496 **UV-CLIP**

497 UV-CLIP was adapted as a modified version of formaldehyde CLIP (40). Briefly, Huh7 cells were  
498 plated in 10 cm dishes, treated with siRNA, and HCV-infected as described above. For UV  
499 crosslinking, supernatant was removed and replaced with 2.5 mL of 4°C PBS. Plates were then  
500 irradiated with 150 mJ/cm<sup>2</sup> 254 nm UV and then cross-linked cells were harvested in 500 µL CLIP-  
501 RIPA buffer (50 mM Tris-HCL pH 7.4, 100 mM NaCl, 1% CA-630, 0.1% SDS, 0.5% sodium  
502 deoxycholate) supplemented with 1 mM dithiothreitol (DTT), protease inhibitor, and RNaseIN+  
503 (Promega). Next, the cross-linked cells were passed through a Qiasredder column (Qiagen)  
504 twice to generate homogenized lysates. These lysates were incubated with 2 µL Turbo DNase I  
505 and 1 µL 1:2000 diluted RNase I for fragmentation for 25 minutes at 37°C with constant agitation  
506 and then clarified by centrifugation (enzymes from New England Biolabs). Equivalent amounts of  
507 lysates were then precleared for 4 hours using protein A beads (Thermo Fisher) that were  
508 preblocked (1 µg of yeast tRNA and 1% BSA per 100 µL of beads in a total volume of 750 µL  
509 CLIP-RIPA buffer). RNA and protein inputs were reserved from these lysates and prepared as  
510 follows: for the RNA input, crosslinks were removed by incubating equal amounts (50 µg) of  
511 precleared lysate in a total volume of 250 µL of CLIP-elution buffer (50 mM Tris-HCL pH 7.4, 5  
512 mM EDTA, 10 mM DTT, 1% SDS, 1% RNaseIN+, 1:100 Proteinase K) and incubated at 50°C for  
513 1 hour with constant agitation, with RNA extracted using TRizol-LS (Thermo Fisher) and reserved  
514 for RT-qPCR; for the protein input, ~10 µg was reserved for immunoblotting. The remaining  
515 precleared lysates were divided and incubated at 4°C for >12 hours with either METTL3-bound  
516 or IgG-bound pre-blocked protein A beads in 1 mL of CLIP-RIPA + 2 µL RNaseIN+. Then, these  
517 samples were washed 5X (CLIP-RIPA +1 M NaCL & 1 M Urea) and 1X (CLIP-RIPA) followed by



518 resuspension in 100  $\mu$ L CLIP-elution buffer without Proteinase K. A portion of this eluate (10  $\mu$ L)  
519 was reserved for immunoblotting, while CLIP-elution buffer (160  $\mu$ L of CLIP-elution buffer) +  
520 Proteinase K (2  $\mu$ l) was added to the remaining 90  $\mu$ L of beads, which were incubated for 1 hour  
521 at 50°C with constant agitation, and RNA was extracted using TRIzol-LS and this and the input  
522 were analyzed by RT-qPCR.

523

### 524 **Immunofluorescent Microscopy**

525 Cells were fixed in 4% paraformaldehyde in PBS, permeabilized with 0.2% Triton X-100 in PBS,  
526 and blocked with 10% FBS in PBS. Slides were stained with indicated antibodies, and incubated  
527 with conjugated Alexa Fluor secondary antibodies (Life Technologies) and mounted with ProLong  
528 Diamond + 4',6-diamidino-2-phenylindole (Invitrogen). Imaging was performed on a Zeiss 880  
529 laser scanning confocal microscope, using a 63x/1.25 oil objective using 405, 488, 561 and laser  
530 lines at a 4x optical zoom with pinholes set to 1 AU for 561 (Light Microscopy Core Facility, Duke  
531 University), or a Leica DM4B widefield fluorescent microscope. Gain and offset settings were  
532 optimized, and final images were taken with line averaging of 4. All images were processed with  
533 NIH Fiji/ImageJ (66). To quantify the Cytoplasmic:Nuclear ratios of proteins, 7 fields from each  
534 biological replicate with at least 5 cells each (21 fields total, >100 cells per condition) were  
535 analyzed in NIH Fiji/ImageJ (66) using the Intensity Ratio Nuclei Cytoplasm Tool,  
536 RRID:SCR\_018573, with protein (METTL3 or WTAP) signal intensity demarcated by the tool, and  
537 then calculated as an average of all cells in each field.

538

### 539 **Antibodies**

540 Antibodies used in this study and their applications include HCV NS5A 9e10 (gift of Dr. Charles  
541 Rice; Immunoblot, FFA, Immunofluorescence), FLAG-HRP (Sigma-Aldrich, A8592; Immunoblot),  
542 HA (Sigma-Aldrich H6908; Immunoblot), METTL3 (Novus Biologicals, AB\_2687437;  
543 Immunoblot), METTL3 (Abcam, ab195352; Immunofluorescence, Immunoprecipitation) FTO

544 (Abcam, ab92821; Immunoblot), WTAP (Proteintech, AB\_10859484; Immunoblot), WTAP  
 545 (Abcam, ab195380; Immunofluorescence), and non-specific rabbit IgG (Cell Signaling  
 546 Technologies, 2729S; Immunoprecipitation).

547

## 548 **Statistical Analysis**

549 Statistical analysis was performed using Graphpad Prism 9. Data appropriate statistical test were  
 550 performed including 1- and 2-way ANOVA with post-hoc testing (Figures 2, 3, 4 ,5 ,6) or Welch's  
 551 t-test (Figure 1). Values are presented as mean  $\pm$  standard deviation of the mean for biological  
 552 replicates (n=3, or as indicated). \* - P < 0.05, \*\* - P < 0.01, \*\*\* - P < 0.001.

553

554 **Table 1**

| <b>Amplicon</b>         | <b>Sense Oligonucleotide<br/>(5' -&gt; 3')</b> | <b>Antisense Oligonucleotide<br/>(5' -&gt; 3')</b> |
|-------------------------|------------------------------------------------|----------------------------------------------------|
| <b>HCV-1 qPCR</b>       | AGAGCCATAGTGGTCTGCGG                           | CTTTCGCAACCCAACGCTAC                               |
| <b>HCV-2 qPCR</b>       | GATAGGGTGCTTGCGAGTGCCC                         | GTCTTCTGGGCGACGGTTGGTG                             |
| <b>HCV-3 qPCR</b>       | CATCCCCAAGATCGGCGCTCC                          | CCAGCCGAGTCCCTCATTCCCA                             |
| <b>HCV-4 qPCR</b>       | ATCTACCCTGGCACCATCAC                           | AGTAGGCCAAGCCGAACAT                                |
| <b>HCV-5 qPCR</b>       | GGCTTTCTCGCGGCCTTGTCT                          | CCCCACCCTATCCGGAAAGCCT                             |
| <b>HCV-6 qPCR</b>       | TGACTTCAACGCCAGCACGGAC                         | CCCCACCCTATCCGGAAAGCCT                             |
| <b>HCV-7 qPCR</b>       | CCCCACCCTATCCGGAAAGCCT                         | CTGATGTGCCAAGCTGCCACGA                             |
| <b>GOLGA3 qPCR</b>      | CGTGAGACCCGAAGAACAAAAC                         | CACCAAAGAGGCTGTACAGTGA                             |
| <b>pLEX FLAG-GFP</b>    | GCGGCCGCTATGGTGAGCAAG<br>GGCGAGG               | ACTCGAGTTAACCTTGTACAGCT<br>CGTCCATGCC              |
| <b>pLEX WTAP-HA</b>     | GAGGATCCATGACCAACGAAGA<br>ACCTCTTCCC           | GACTCGAGTTAGTAGTCTGGGAC<br>GTCGTATGGG              |
| <b>pLEX FLAG-METTL3</b> | CACAGATCTACCATGGATTATAA<br>GGATGATGATG         | CACGTGACTTAAACCTATAAATT<br>CTTAGGTTTAGAG           |

|                                                            |                                                                 |                                                                  |
|------------------------------------------------------------|-----------------------------------------------------------------|------------------------------------------------------------------|
| <b>pLEX<br/>WTAP<math>\Delta</math>NLS-HA</b>              | CCGACTCTACTAGAGGATCCGC<br>CACCATGAGTGAAACAGACTTC<br>AAAGTTATGGC | GA CT CG AG TT AG TAG T CT G GG G AC<br>G T C G T A T G G G      |
| <b>pEFtak-WTAP-<br/>FLAG</b>                               | GGTACCATGACCAACGAAGAAC<br>CTCTT                                 | TTATAATCAGCGGCCGCCAAAAC<br>TGAACCCTGTACATTTACAC                  |
| <b>pEFtak-HA-<br/>METTL3</b>                               | CGTCCCAGACTACGCGGCCGCT<br>TCGGACACGTGGAGCTCTATCC                | CTGATCAGCGGGTTTAAACCTAT<br>AAATTCTTAGGTTTAGAGATGATA<br>CCATCTGGG |
| <b>pEFtak-<br/>WTAP<math>\Delta</math>NLS-<br/>FLAG</b>    | CTTGGTACCATGAGTGAAACAG<br>ACTTCAAAGTTATGGCAAG                   | TTATAATCAGCGGCCGCCAAAAC<br>TGAACCCTGTACATTTACAC                  |
| <b>pEFtak-<br/>WTAP<math>\Delta</math>METTL3-<br/>FLAG</b> | AGGTAAGCTTGGTACCATGTTT<br>CTAAAATGAAAGGTGAACTGG<br>AACAG        | AGGTAAGCTTGGTACCATGTTT<br>TAAAATGAAAGGTGAACTGGAA<br>CAG          |
| <b>pLEX-<br/>WTAP<math>\Delta</math>METTL3-<br/>HA</b>     | CCGACTCTACTAGAGGATCCGC<br>CACCATGTTCTAAAATGAAAG<br>GTGAACTGGAAC | CCGACTCTACTAGAGGATCCGCC<br>ACTGTTCTAAAATGAAAGGTG<br>AACTGGAAC    |

555

## 556 REFERENCES

557

- 558 1. Manns MP, Buti M, Gane E, Pawlotsky JM, Razavi H, Terrault N, Younossi Z. 2017.  
559 Hepatitis C virus infection. *Nat Rev Dis Primers* 3:17006.
- 560 2. Moradpour D, Penin F, Rice CM. 2007. Replication of hepatitis C virus. *Nat Rev Microbiol*  
561 5:453-63.
- 562 3. Shulla A, Randall G. 2015. Spatiotemporal analysis of hepatitis C virus infection. *PLoS*  
563 *Pathog* 11:e1004758.
- 564 4. Niepmann M, Shalamova LA, Gerresheim GK, Roszbach O. 2018. Signals Involved in  
565 Regulation of Hepatitis C Virus RNA Genome Translation and Replication. *Front Microbiol*  
566 9:395.
- 567 5. Gokhale NS, McIntyre ABR, McFadden MJ, Roder AE, Kennedy EM, Gandara JA,  
568 Hopcraft SE, Quicke KM, Vazquez C, Willer J, Ilkayeva OR, Law BA, Holley CL, Garcia-  
569 Blanco MA, Evans MJ, Suthar MS, Bradrick SS, Mason CE, Horner SM. 2016. N6-  
570 Methyladenosine in Flaviviridae Viral RNA Genomes Regulates Infection. *Cell Host*  
571 *Microbe* 20:654-665.
- 572 6. Williams GD, Gokhale NS, Horner SM. 2019. Regulation of Viral Infection by the RNA  
573 Modification N6-Methyladenosine. *Annu Rev Virol* 6:235-253.
- 574 7. Gokhale NS, McIntyre ABR, Mattocks MD, Holley CL, Lazear HM, Mason CE, Horner SM.  
575 2020. Altered m(6)A Modification of Specific Cellular Transcripts Affects Flaviviridae  
576 Infection. *Mol Cell* 77:542-555 e8.
- 577 8. McFadden MJ, McIntyre ABR, Mourelatos H, Abell NS, Gokhale NS, Ipas H, Xhemalce B,  
578 Mason CE, Horner SM. 2021. Post-transcriptional regulation of antiviral gene expression  
579 by N6-methyladenosine. *Cell Rep* 34:108798.
- 580 9. Wang X, Zhao BS, Roundtree IA, Lu Z, Han D, Ma H, Weng X, Chen K, Shi H, He C.  
581 2015. N(6)-methyladenosine Modulates Messenger RNA Translation Efficiency. *Cell*  
582 161:1388-99.

- 583 10. Wang X, Lu Z, Gomez A, Hon GC, Yue Y, Han D, Fu Y, Parisien M, Dai Q, Jia G, Ren B,  
584 Pan T, He C. 2014. N6-methyladenosine-dependent regulation of messenger RNA  
585 stability. *Nature* 505:117-20.
- 586 11. Arguello AE, DeLiberto AN, Kleiner RE. 2017. RNA Chemical Proteomics Reveals the  
587 N(6)-Methyladenosine (m(6)A)-Regulated Protein-RNA Interactome. *J Am Chem Soc*  
588 139:17249-17252.
- 589 12. Edupuganti RR, Geiger S, Lindeboom RGH, Shi H, Hsu PJ, Lu Z, Wang SY, Baltissen  
590 MPA, Jansen P, Rossa M, Muller M, Stunnenberg HG, He C, Carell T, Vermeulen M.  
591 2017. N(6)-methyladenosine (m(6)A) recruits and repels proteins to regulate mRNA  
592 homeostasis. *Nat Struct Mol Biol* 24:870-878.
- 593 13. Liu J, Yue Y, Han D, Wang X, Fu Y, Zhang L, Jia G, Yu M, Lu Z, Deng X, Dai Q, Chen W,  
594 He C. 2014. A METTL3-METTL14 complex mediates mammalian nuclear RNA N6-  
595 adenosine methylation. *Nat Chem Biol* 10:93-5.
- 596 14. Dominissini D, Moshitch-Moshkovitz S, Schwartz S, Salmon-Divon M, Ungar L, Osenberg  
597 S, Cesarkas K, Jacob-Hirsch J, Amariglio N, Kupiec M, Sorek R, Rechavi G. 2012.  
598 Topology of the human and mouse m6A RNA methylomes revealed by m6A-seq. *Nature*  
599 485:201-6.
- 600 15. Meyer KD, Saletore Y, Zumbo P, Elemento O, Mason CE, Jaffrey SR. 2012.  
601 Comprehensive analysis of mRNA methylation reveals enrichment in 3' UTRs and near  
602 stop codons. *Cell* 149:1635-46.
- 603 16. Ping XL, Sun BF, Wang L, Xiao W, Yang X, Wang WJ, Adhikari S, Shi Y, Lv Y, Chen YS,  
604 Zhao X, Li A, Yang Y, Dahal U, Lou XM, Liu X, Huang J, Yuan WP, Zhu XF, Cheng T,  
605 Zhao YL, Wang X, Rendtlew Danielsen JM, Liu F, Yang YG. 2014. Mammalian WTAP is  
606 a regulatory subunit of the RNA N6-methyladenosine methyltransferase. *Cell Res* 24:177-  
607 89.
- 608 17. Scholler E, Weichmann F, Treiber T, Ringle S, Treiber N, Flatley A, Feederle R,  
609 Bruckmann A, Meister G. 2018. Interactions, localization, and phosphorylation of the  
610 m(6)A generating METTL3-METTL14-WTAP complex. *RNA* 24:499-512.
- 611 18. Horiuchi K, Kawamura T, Iwanari H, Ohashi R, Naito M, Kodama T, Hamakubo T. 2013.  
612 Identification of Wilms' tumor 1-associating protein complex and its role in alternative  
613 splicing and the cell cycle. *J Biol Chem* 288:33292-302.
- 614 19. Knuckles P, Lence T, Haussmann IU, Jacob D, Kreim N, Carl SH, Masiello I, Hares T,  
615 Villasenor R, Hess D, Andrade-Navarro MA, Biggiogera M, Helm M, Soller M, Buhler M,  
616 Roignant JY. 2018. Zc3h13/Flacc is required for adenosine methylation by bridging the  
617 mRNA-binding factor Rbm15/Spenito to the m(6)A machinery component Wtap/FI(2)d.  
618 *Genes Dev* 32:415-429.
- 619 20. Moindrot B, Cerase A, Coker H, Masui O, Grijzenhout A, Pintacuda G, Schermelleh L,  
620 Nesterova TB, Brockdorff N. 2015. A Pooled shRNA Screen Identifies Rbm15, Spen, and  
621 Wtap as Factors Required for Xist RNA-Mediated Silencing. *Cell Rep* 12:562-72.
- 622 21. Jia G, Fu Y, Zhao X, Dai Q, Zheng G, Yang Y, Yi C, Lindahl T, Pan T, Yang YG, He C.  
623 2011. N6-methyladenosine in nuclear RNA is a major substrate of the obesity-associated  
624 FTO. *Nat Chem Biol* 7:885-7.
- 625 22. Kim GW, Siddiqui A. 2021. The role of N6-methyladenosine modification in the life cycle  
626 and disease pathogenesis of hepatitis B and C viruses. *Exp Mol Med* 53:339-345.
- 627 23. Kim GW, Siddiqui A. 2021. N6-methyladenosine modification of HCV RNA genome  
628 regulates cap-independent IRES-mediated translation via YTHDC2 recognition. *Proc Natl*  
629 *Acad Sci U S A* 118.
- 630 24. Pereira-Montecinos C, Toro-Ascuy D, Ananias-Saez C, Gaete-Argel A, Rojas-Fuentes C,  
631 Riquelme-Barrios S, Rojas-Araya B, Garcia-de-Gracia F, Aguilera-Cortes P, Chnaiderman  
632 J, Acevedo ML, Valiente-Echeverria F, Soto-Rifo R. 2022. Epitranscriptomic regulation of  
633 HIV-1 full-length RNA packaging. *Nucleic Acids Res* 50:2302-2318.

- 634 25. Li N, Rana TM. 2022. Regulation of antiviral innate immunity by chemical modification of  
635 viral RNA. *Wiley Interdiscip Rev RNA* doi:10.1002/wrna.1720:e1720.
- 636 26. Li N, Hui H, Bray B, Gonzalez GM, Zeller M, Anderson KG, Knight R, Smith D, Wang Y,  
637 Carlin AF, Rana TM. 2021. METTL3 regulates viral m6A RNA modification and host cell  
638 innate immune responses during SARS-CoV-2 infection. *Cell Rep* 35:109091.
- 639 27. Kim GW, Siddiqui A. 2021. Hepatitis B virus X protein recruits methyltransferases to affect  
640 cotranscriptional N6-methyladenosine modification of viral/host RNAs. *Proc Natl Acad Sci*  
641 *U S A* 118.
- 642 28. Yao M, Dong Y, Wang Y, Liu H, Ma H, Zhang H, Zhang L, Cheng L, Lv X, Xu Z, Zhang F,  
643 Lei Y, Ye W. 2020. N(6)-methyladenosine modifications enhance enterovirus 71 ORF  
644 translation through METTL3 cytoplasmic distribution. *Biochem Biophys Res Commun*  
645 527:297-304.
- 646 29. Winkler R, Gillis E, Lasman L, Safra M, Geula S, Soyris C, Nachshon A, Tai-Schmiedel J,  
647 Friedman N, Le-Trilling VTK, Trilling M, Mandelboim M, Hanna JH, Schwartz S, Stern-  
648 Ginossar N. 2019. Publisher Correction: m6A modification controls the innate immune  
649 response to infection by targeting type I interferons. *Nat Immunol* 20:243.
- 650 30. Rubio RM, Depledge DP, Bianco C, Thompson L, Mohr I. 2018. RNA m(6) A modification  
651 enzymes shape innate responses to DNA by regulating interferon beta. *Genes Dev*  
652 32:1472-1484.
- 653 31. Zhu T, Roundtree IA, Wang P, Wang X, Wang L, Sun C, Tian Y, Li J, He C, Xu Y. 2014.  
654 Crystal structure of the YTH domain of YTHDF2 reveals mechanism for recognition of N6-  
655 methyladenosine. *Cell Res* 24:1493-6.
- 656 32. Kim GW, Imam H, Khan M, Siddiqui A. 2020. N (6)-Methyladenosine modification of  
657 hepatitis B and C viral RNAs attenuates host innate immunity via RIG-I signaling. *J Biol*  
658 *Chem* 295:13123-13133.
- 659 33. Slobodin B, Han R, Calderone V, Vrieling J, Loayza-Puch F, Elkon R, Agami R. 2017.  
660 Transcription Impacts the Efficiency of mRNA Translation via Co-transcriptional N6-  
661 adenosine Methylation. *Cell* 169:326-337 e12.
- 662 34. Ke S, Pandya-Jones A, Saito Y, Fak JJ, Vagbo CB, Geula S, Hanna JH, Black DL, Darnell  
663 JE, Jr., Darnell RB. 2017. m(6)A mRNA modifications are deposited in nascent pre-mRNA  
664 and are not required for splicing but do specify cytoplasmic turnover. *Genes Dev* 31:990-  
665 1006.
- 666 35. Wen J, Lv R, Ma H, Shen H, He C, Wang J, Jiao F, Liu H, Yang P, Tan L, Lan F, Shi YG,  
667 He C, Shi Y, Diao J. 2018. Zc3h13 Regulates Nuclear RNA m(6)A Methylation and Mouse  
668 Embryonic Stem Cell Self-Renewal. *Mol Cell* 69:1028-1038 e6.
- 669 36. Choe J, Lin S, Zhang W, Liu Q, Wang L, Ramirez-Moya J, Du P, Kim W, Tang S, Sliz P,  
670 Santisteban P, George RE, Richards WG, Wong KK, Locker N, Slack FJ, Gregory RI.  
671 2018. mRNA circularization by METTL3-eIF3h enhances translation and promotes  
672 oncogenesis. *Nature* 561:556-560.
- 673 37. Hao H, Hao S, Chen H, Chen Z, Zhang Y, Wang J, Wang H, Zhang B, Qiu J, Deng F,  
674 Guan W. 2019. N6-methyladenosine modification and METTL3 modulate enterovirus 71  
675 replication. *Nucleic Acids Res* 47:362-374.
- 676 38. Lu M, Zhang Z, Xue M, Zhao BS, Harder O, Li A, Liang X, Gao TZ, Xu Y, Zhou J, Feng Z,  
677 Niewiesk S, Peeples ME, He C, Li J. 2020. N(6)-methyladenosine modification enables  
678 viral RNA to escape recognition by RNA sensor RIG-I. *Nat Microbiol* 5:584-598.
- 679 39. Eyre NS, Fiches GN, Aloia AL, Helbig KJ, McCartney EM, McErlean CS, Li K, Aggarwal  
680 A, Turville SG, Beard MR. 2014. Dynamic imaging of the hepatitis C virus NS5A protein  
681 during a productive infection. *J Virol* 88:3636-52.
- 682 40. Patil DP, Chen CK, Pickering BF, Chow A, Jackson C, Guttman M, Jaffrey SR. 2016.  
683 m(6)A RNA methylation promotes XIST-mediated transcriptional repression. *Nature*  
684 537:369-373.

- 685 41. Zhang J, Randall G, Higginbottom A, Monk P, Rice CM, McKeating JA. 2004. CD81 is  
686 required for hepatitis C virus glycoprotein-mediated viral infection. *J Virol* 78:1448-55.
- 687 42. Yamane D, McGivern DR, Wauthier E, Yi M, Madden VJ, Welsch C, Antes I, Wen Y,  
688 Chugh PE, McGee CE, Widman DG, Misumi I, Bandyopadhyay S, Kim S, Shimakami T,  
689 Oikawa T, Whitmire JK, Heise MT, Dittmer DP, Kao CC, Pitson SM, Merrill AH, Jr., Reid  
690 LM, Lemon SM. 2014. Regulation of the hepatitis C virus RNA replicase by endogenous  
691 lipid peroxidation. *Nat Med* 20:927-35.
- 692 43. Tai AW, Benita Y, Peng LF, Kim SS, Sakamoto N, Xavier RJ, Chung RT. 2009. A  
693 functional genomic screen identifies cellular cofactors of hepatitis C virus replication. *Cell*  
694 *Host Microbe* 5:298-307.
- 695 44. Kobayashi M, Ohsugi M, Sasako T, Awazawa M, Umehara T, Iwane A, Kobayashi N,  
696 Okazaki Y, Kubota N, Suzuki R, Waki H, Horiuchi K, Hamakubo T, Kodama T, Aoe S,  
697 Tobe K, Kadowaki T, Ueki K. 2018. The RNA Methyltransferase Complex of WTAP,  
698 METTL3, and METTL14 Regulates Mitotic Clonal Expansion in Adipogenesis. *Mol Cell*  
699 *Biol* 38.
- 700 45. Wu C, Chen W, He J, Jin S, Liu Y, Yi Y, Gao Z, Yang J, Yang J, Cui J, Zhao W. 2020.  
701 Interplay of m(6)A and H3K27 trimethylation restrains inflammation during bacterial  
702 infection. *Sci Adv* 6:eaba0647.
- 703 46. Barbieri I, Tzelepis K, Pandolfini L, Shi J, Millan-Zambrano G, Robson SC, Aspris D,  
704 Migliori V, Bannister AJ, Han N, De Braekeleer E, Ponstingl H, Hendrick A, Vakoc CR,  
705 Vassiliou GS, Kouzarides T. 2017. Promoter-bound METTL3 maintains myeloid  
706 leukaemia by m(6)A-dependent translation control. *Nature* 552:126-131.
- 707 47. Harper JE, Miceli SM, Roberts RJ, Manley JL. 1990. Sequence specificity of the human  
708 mRNA N6-adenosine methylase in vitro. *Nucleic Acids Res* 18:5735-41.
- 709 48. Kane SE, Beemon K. 1985. Precise localization of m6A in Rous sarcoma virus RNA  
710 reveals clustering of methylation sites: implications for RNA processing. *Mol Cell Biol*  
711 5:2298-306.
- 712 49. Horowitz S, Horowitz A, Nilsen TW, Munns TW, Rottman FM. 1984. Mapping of N6-  
713 methyladenosine residues in bovine prolactin mRNA. *Proc Natl Acad Sci U S A* 81:5667-  
714 71.
- 715 50. Narayan P, Rottman FM. 1988. An in vitro system for accurate methylation of internal  
716 adenosine residues in messenger RNA. *Science* 242:1159-62.
- 717 51. Bokar JA, Rath-Shambaugh ME, Ludwiczak R, Narayan P, Rottman F. 1994.  
718 Characterization and partial purification of mRNA N6-adenosine methyltransferase from  
719 HeLa cell nuclei. Internal mRNA methylation requires a multisubunit complex. *J Biol Chem*  
720 269:17697-704.
- 721 52. Bokar JA, Shambaugh ME, Polayes D, Matera AG, Rottman FM. 1997. Purification and  
722 cDNA cloning of the AdoMet-binding subunit of the human mRNA (N6-adenosine)-  
723 methyltransferase. *RNA* 3:1233-47.
- 724 53. Huang H, Weng H, Zhou K, Wu T, Zhao BS, Sun M, Chen Z, Deng X, Xiao G, Auer F.  
725 2019. Histone H3 trimethylation at lysine 36 guides m6A RNA modification co-  
726 transcriptionally. *Nature* 567:414-419.
- 727 54. Yue Y, Liu J, Cui X, Cao J, Luo G, Zhang Z, Cheng T, Gao M, Shu X, Ma H, Wang F,  
728 Wang X, Shen B, Wang Y, Feng X, He C, Liu J. 2018. VIRMA mediates preferential m(6)A  
729 mRNA methylation in 3'UTR and near stop codon and associates with alternative  
730 polyadenylation. *Cell Discov* 4:10.
- 731 55. Paul D, Madan V, Bartenschlager R. 2014. Hepatitis C virus RNA replication and  
732 assembly: living on the fat of the land. *Cell Host Microbe* 16:569-79.
- 733 56. Neufeldt CJ, Joyce MA, Van Buuren N, Levin A, Kirkegaard K, Gale M, Jr., Tyrrell DL,  
734 Wozniak RW. 2016. The Hepatitis C Virus-Induced Membranous Web and Associated

- 735 Nuclear Transport Machinery Limit Access of Pattern Recognition Receptors to Viral  
736 Replication Sites. *PLoS Pathog* 12:e1005428.
- 737 57. Neufeldt CJ, Joyce MA, Levin A, Steenbergen RH, Pang D, Shields J, Tyrrell DL, Wozniak  
738 RW. 2013. Hepatitis C virus-induced cytoplasmic organelles use the nuclear transport  
739 machinery to establish an environment conducive to virus replication. *PLoS Pathog*  
740 9:e1003744.
- 741 58. Ramage HR, Kumar GR, Verschueren E, Johnson JR, Von Dollen J, Johnson T, Newton  
742 B, Shah P, Horner J, Krogan NJ, Ott M. 2015. A combined proteomics/genomics approach  
743 links hepatitis C virus infection with nonsense-mediated mRNA decay. *Mol Cell* 57:329-  
744 340.
- 745 59. Haddad JG, Rouille Y, Hanouille X, Descamps V, Hamze M, Dabboussi F, Baumert TF,  
746 Duverlie G, Lavie M, Dubuisson J. 2017. Identification of Novel Functions for Hepatitis C  
747 Virus Envelope Glycoprotein E1 in Virus Entry and Assembly. *J Virol* 91.
- 748 60. Einav S, Elazar M, Danieli T, Glenn JS. 2004. A nucleotide binding motif in hepatitis C  
749 virus (HCV) NS4B mediates HCV RNA replication. *J Virol* 78:11288-95.
- 750 61. Dumont S, Cheng W, Serebrov V, Beran RK, Tinoco I, Jr., Pyle AM, Bustamante C. 2006.  
751 RNA translocation and unwinding mechanism of HCV NS3 helicase and its coordination  
752 by ATP. *Nature* 439:105-8.
- 753 62. Zhang X, Hao H, Ma L, Zhang Y, Hu X, Chen Z, Liu D, Yuan J, Hu Z, Guan W. 2021.  
754 Methyltransferase-like 3 Modulates Severe Acute Respiratory Syndrome Coronavirus-2  
755 RNA N6-Methyladenosine Modification and Replication. *mBio* 12:e0106721.
- 756 63. Sumpter R, Jr., Loo YM, Foy E, Li K, Yoneyama M, Fujita T, Lemon SM, Gale M, Jr. 2005.  
757 Regulating intracellular antiviral defense and permissiveness to hepatitis C virus RNA  
758 replication through a cellular RNA helicase, RIG-I. *J Virol* 79:2689-99.
- 759 64. Hopcraft SE, Evans MJ. 2015. Selection of a hepatitis C virus with altered entry factor  
760 requirements reveals a genetic interaction between the E1 glycoprotein and claudins.  
761 *Hepatology* 62:1059-69.
- 762 65. Aligeti M, Roder A, Horner SM. 2015. Cooperation between the Hepatitis C Virus p7 and  
763 NS5B Proteins Enhances Virion Infectivity. *J Virol* 89:11523-33.
- 764 66. Schindelin J, Arganda-Carreras I, Frise E, Kaynig V, Longair M, Pietzsch T, Preibisch S,  
765 Rueden C, Saalfeld S, Schmid B, Tinevez JY, White DJ, Hartenstein V, Eliceiri K,  
766 Tomancak P, Cardona A. 2012. Fiji: an open-source platform for biological-image  
767 analysis. *Nat Methods* 9:676-82.
- 768
